# Supplementary material
Source: publisher site journal article supplement (https://spandidos-publications.com/3635/downloadSupplementary)

Figure S1. sIL-4 concentration in the serum measured by ELISA. Approximately 2-3 ng/ml of IL-4 protein was detected in IL-4-infected mice seven days after adenovirus injection. sIL-4, secreted IL-4; IL-4, adenovirus-expressed IL-4 vector; LacZ, adenovirus-expressed  $\beta$ -galactosidase; WT, wild-type.

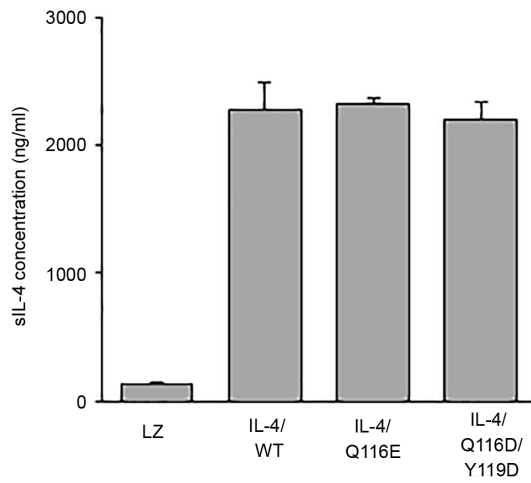

Figure S2. Histological examination of the retinas of mice after adenovirus vector infection and laser coagulation. Histograms show the thickness of the INL, ONL and RNFL. IL-4, adenovirus-expressed IL-4 vector; INL, inner nuclear layer; LacZ, adenovirus-expressed  $\beta$ -galactosidase; ONL, outer nuclear layer; RNFL, retinal nerve fiber layer; WT, wild-type.

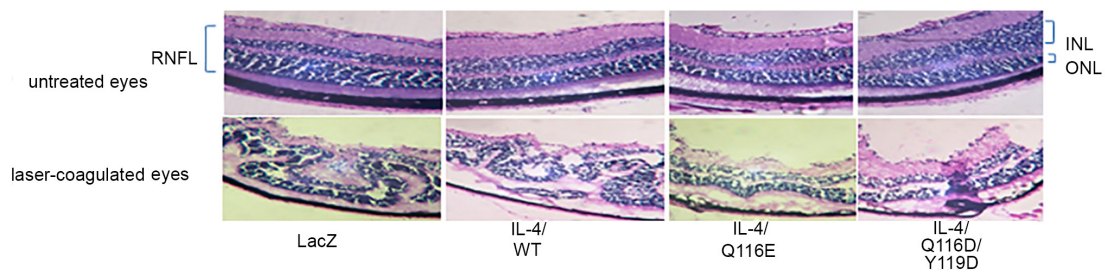

Supplement: Supplementary file 1 [file downloadSupplementary]
